# Supplementary material for: Efficient transmission of human prion diseases to a glycan-free prion protein-expressing host
Source: PubMed Central journal article supplement (PMC10994570; doi:10.1093/brain/awad399), 2023-11-24

# Efficient transmission of human prion diseases to a glycan-free prion protein-expressing host

**Laura Cracco,<sup>1</sup> Ignazio Cali,<sup>2,3</sup> Mark L. Cohen,<sup>2</sup> Rabail Aslam,<sup>2</sup> Silvio Notari,<sup>2</sup> Qingzhong Kong,<sup>2,3,4</sup> Kathy L. Newell,<sup>1</sup> Bernardino Ghetti,<sup>1</sup> Brian S. Appleby,<sup>2,3,4,5</sup> Pierluigi Gambetti<sup>2</sup>**

<sup>1</sup> Department of Pathology and Laboratory Medicine, Indiana University School of Medicine, Indianapolis, IN 46202, USA.

<sup>2</sup> Department of Pathology, Case Western Reserve University, School of Medicine, Cleveland, OH 44106, USA.

<sup>3</sup> National Prion Disease Pathology Surveillance Center, Case Western Reserve University, School of Medicine, Cleveland, OH 44106, USA.

<sup>4</sup> Department of Neurology, Case Western Reserve University, School of Medicine, Cleveland, OH 44106, USA.

<sup>5</sup> Department of Psychiatry, Case Western Reserve University, Cleveland, OH 44106, USA.

## **Address correspondence to:**

**Pierluigi Gambetti:** Department of Pathology, Case Western Reserve University, School of Medicine, Cleveland, OH 44106, USA. Phone 216.410.6883; Email: [pxg13@case.edu](mailto:pxg13@case.edu)

**Laura Cracco:** Department of Pathology and Laboratory Medicine, Indiana University School of Medicine, Indianapolis, IN, 46202, USA. Phone: 317.274.1658; Email: [lcracco@iu.edu](mailto:lcracco@iu.edu)

**Supplementary Table 1:** Summary of the main findings

| Parameters                                                      | Sporadic CJD MM2                                                                                                                    | Sporadic Fatal Insomnia                                                                                               | Familial Fatal Insomnia                                                                                        |
|-----------------------------------------------------------------|-------------------------------------------------------------------------------------------------------------------------------------|-----------------------------------------------------------------------------------------------------------------------|----------------------------------------------------------------------------------------------------------------|
| <b>Histopathology in human diseases</b>                         | SD: Large, confluent vacuoles w. PrP deposits, preferentially in the neocortex                                                      | SD: Similar to sCJDMM2 but less severe, its presence depends on disease duration (>24 months). Focal thalamic atrophy | SD: Similar to sCJDMM2 but much less severe and strictly dependent on disease duration. Focal thalamic atrophy |
| <b>Inoculated mice</b>                                          |                                                                                                                                     |                                                                                                                       |                                                                                                                |
| <b>Glyc- mice average incubation periods (in dpi)</b>           | 1 <sup>st</sup> p.: 266 (~2x shorter than Glyc+ controls).<br>2 <sup>nd</sup> & 3 <sup>rd</sup> p.: 78                              | 1 <sup>st</sup> p.: 346 (~1.8x shorter than Glyc+ controls).<br>2 <sup>nd</sup> & 3 <sup>rd</sup> p.: 114             | 1 <sup>st</sup> p.: 289 (no transmission in controls).<br>2 <sup>nd</sup> p.: 193                              |
| <b>Histopathology in Glyc- mice and in Glyc+ controls</b>       | SD & PrP deposition similar to hu. disease; ~4x more severe than controls, w. large PrP deposit & high astro-microglia reactions    | Same as after sCJDMM2 transmission and more severe than in controls                                                   | Same as in sFI-Glyc- mice but slightly less severe                                                             |
| <b>Histopathology severity &amp; incubation period</b>          | Severity, accurate SD replication and presence of the large PrP deposits directly correlated w. the length of the incubation period |                                                                                                                       |                                                                                                                |
| <b>resPrP<sup>D</sup> WB in Glyc- mice</b>                      | Same electrophoretic mobility as unglycosylated in Glyc+ and 3 hu. diseases                                                         |                                                                                                                       |                                                                                                                |
| <b>resPrP<sup>D</sup> quantitative assessment in Glyc- mice</b> | ~40x > Glyc+ control                                                                                                                | Definitely > controls                                                                                                 | High; no controls avail.                                                                                       |
| <b>Tot &amp; resPrP<sup>D</sup> SE profiles</b>                 | Glyc- mice: prevalence of high-density aggregates<br>Glyc+ mice: prevalence of low-density aggregates                               |                                                                                                                       | Not tested                                                                                                     |
| <b>Glyc- mice: CSSA</b>                                         | Significant increase in resPrP <sup>D</sup> stability                                                                               | Not tested                                                                                                            | Not tested                                                                                                     |
| <b>Glyc- mice: Anchorless resPrP<sup>D</sup> as % of total</b>  | 21.1: Similar to that of the sCJDMM2 (17.4)                                                                                         | Not tested                                                                                                            | Not tested                                                                                                     |

**Abbreviations:** avail.: available; CSSA: conformational solubility and stability assay; dpi: days post-inoculations; Glyc-: TgGlyc mice; hu.: human; mo.: months; p.: passage; SD: spongiform degeneration; w.: with; WB: western blot; SE: sedimentation equilibrium.

**Supplementary Figure 1** Original uncropped immunoblots shown in Figures 5 A, and 5 B. Red boxes indicate the cropped region shown in the corresponding panel.

**Fig. 5 A**

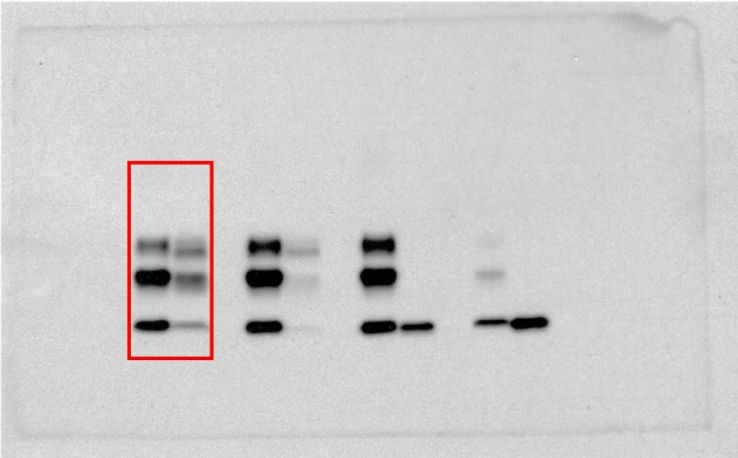

Panel 1

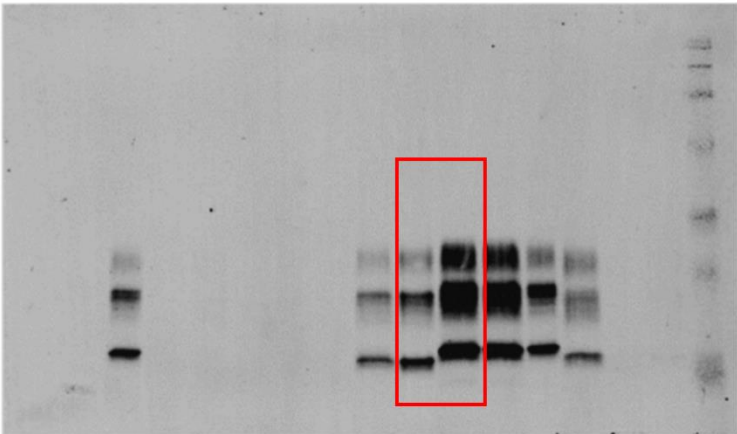

Panel 2

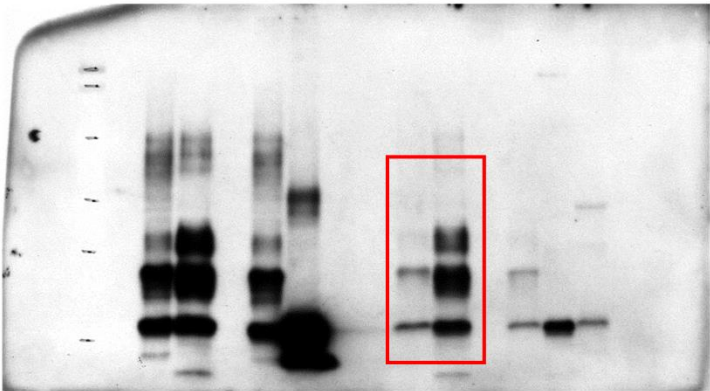

Panel 3

**Fig. 5 B**

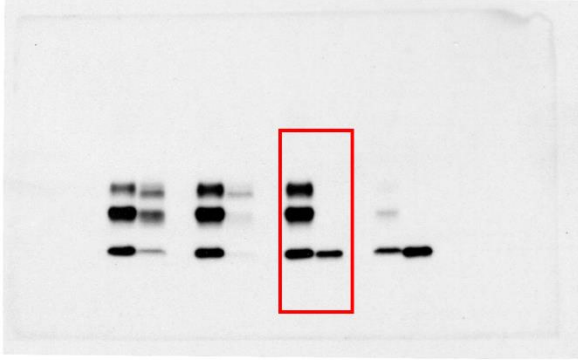

Panel 1

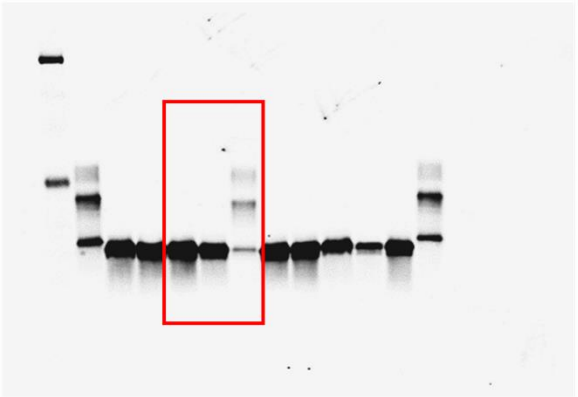

Panel 2

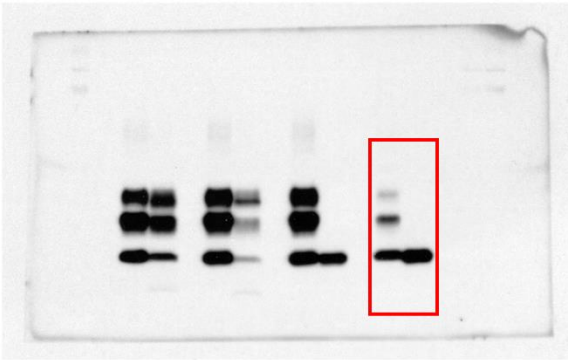

Panel 3

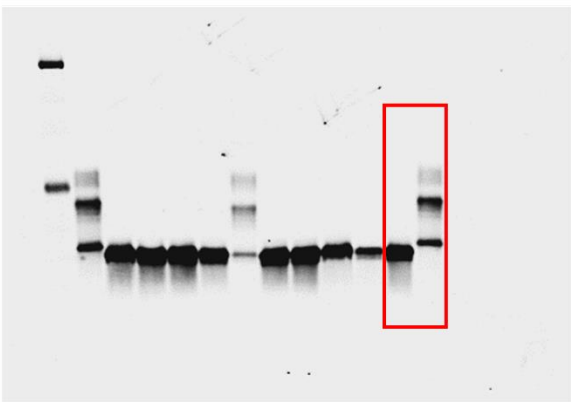

Panel 4

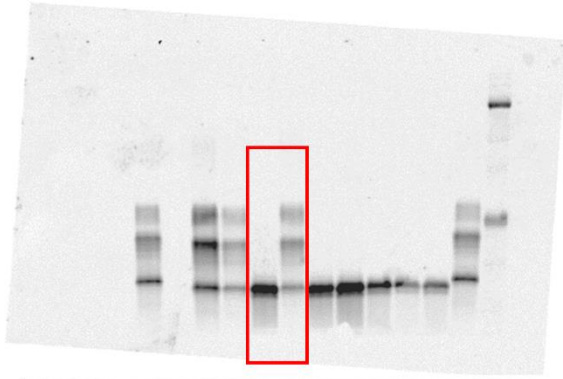

Panel 5

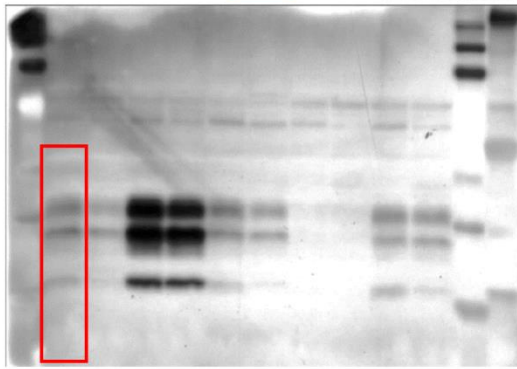

Panel 6

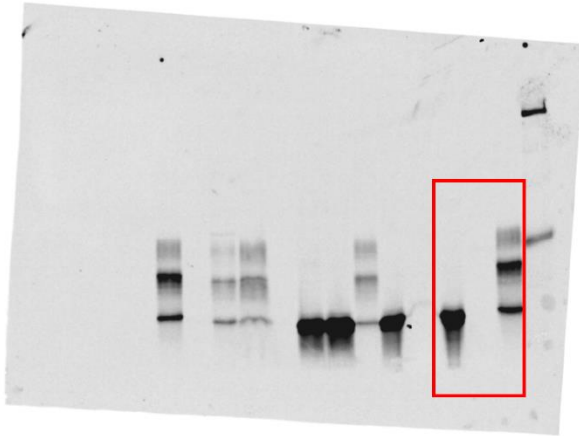

Panel 7

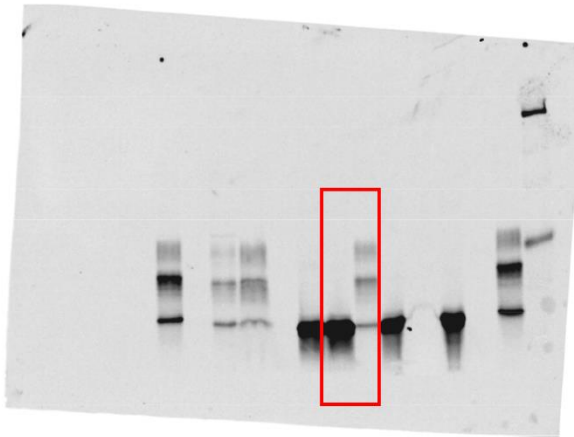

Panel 8

**Supplementary Figure 2** Original uncropped immunoblots shown in Figures 7 B(i), 7 B(ii), 7 C and 7 D. Red boxes indicate the cropped region shown in the corresponding panel.

**Fig. 7 B(i)**

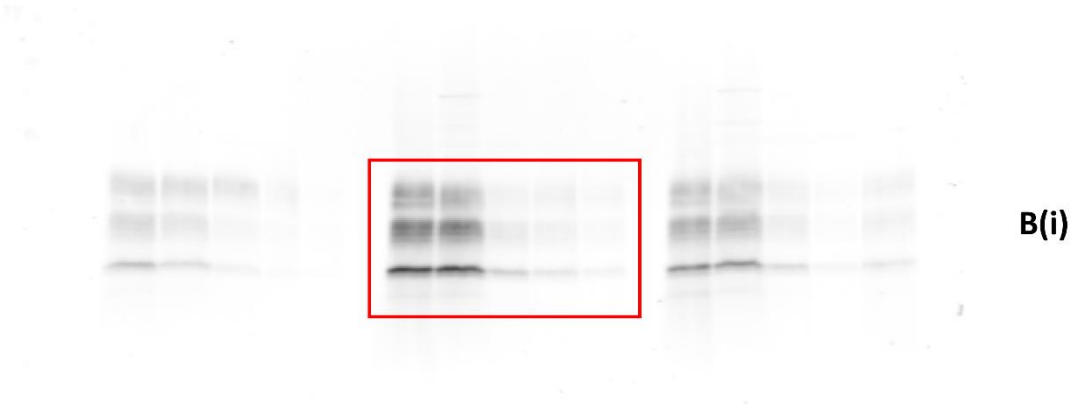

**Fig. 7 B(ii)**

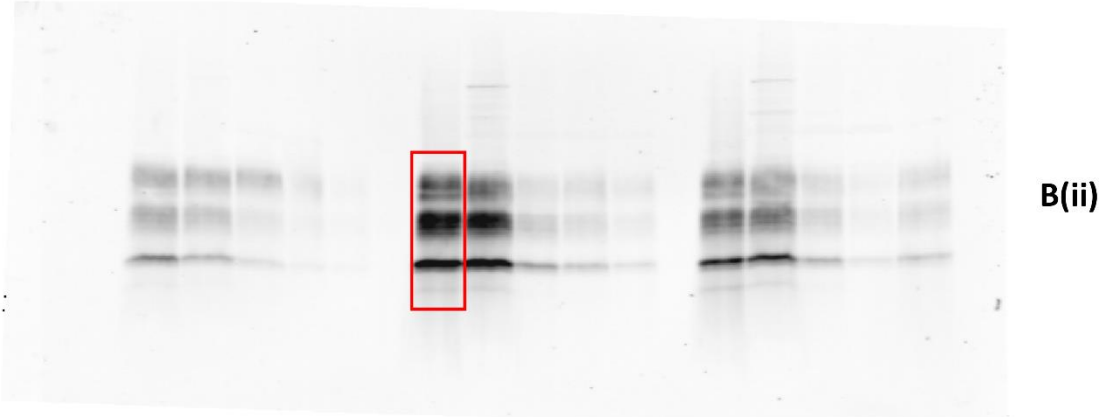

**Fig. 7 C**

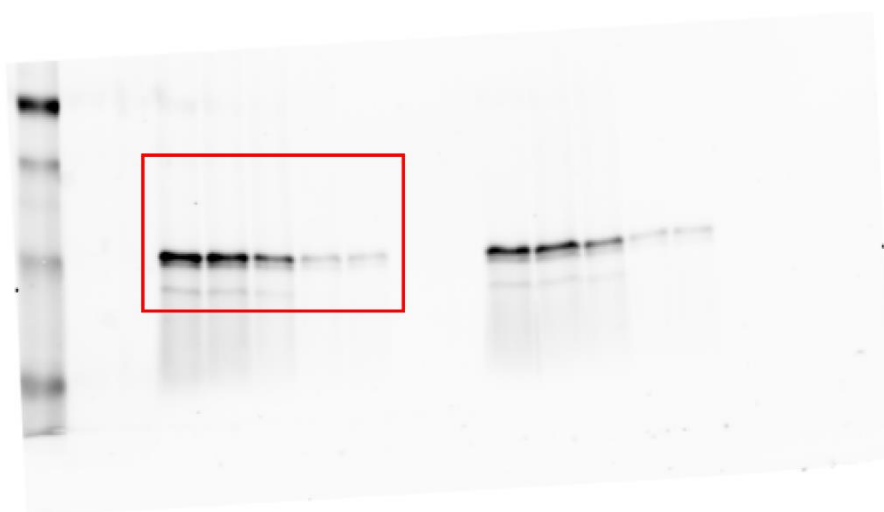

**Fig. 7 D**

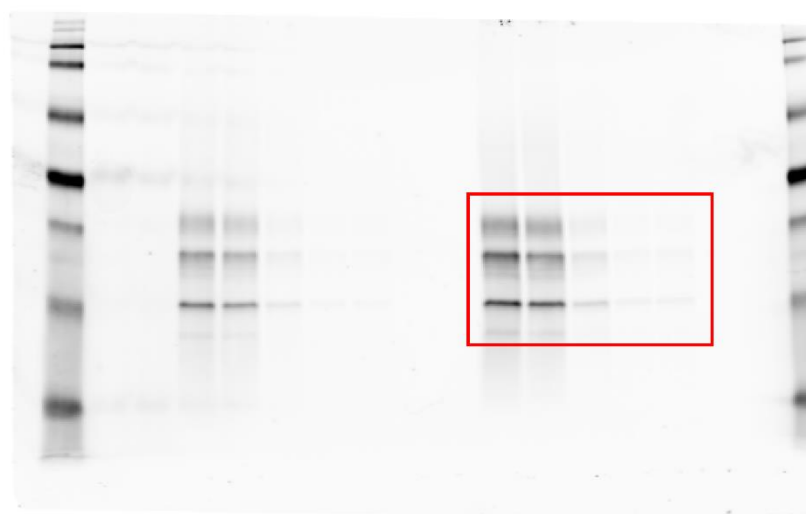

Supplement: awad399_supplementary_data.pdf [file awad399_supplementary_data.pdf]
